# Supplementary material
Source: Research Square preprint supplement (doi:10.21203/rs.3.rs-8969121/v1)
Supplement: Supplementary file 1 [file e41a6085874de85b6a1b19b5.docx]

**Supplementary Table S1** Specific definitions of social determinants of health (SDoH) from Healthy People 2030 framework in National Health and Nutrition Examination Survey

| **Domains** | **Sub-items** | **Dichotomous categories** | **Original categories** |
| --- | --- | --- | --- |
| **Economic Stability** | Employment status | 0: Employed, student, or retired 1: Unemployed | Employed, student, or retired Unemployed |
| Family income-to-poverty ratio | 0: 300% 1: < 300% | > 500%  300-500% 100-300% < 100% |
| Food security | 0: Full security 1: Marginal, low, or very low security | AD full food security (0 affirmative) AD marginal food security (1-2 affirmative) AD low food security (3-5 affirmative) AD very low food security (6-10 affirmative) |
| **Education Access and Quality** | Education level | 0: High school graduate or higher 1: Less than high school | College Some college or AA degree High school Less than high school |
| **Health Care Access and Quality** | Health insurance coverage | 0: Yes 1: No | Yes No |
| Type of health insurance | 0: Private 1: Government or none | Private insurance Government insurance No insurance |
| **Neighborhood and Built Environment** | Home ownership | 0: Own home 1: Rent home or other arrangement | Own home Rent home Other arrangement |
| **Social and Community Context** | Marital status | 0: Married or living with a partner 1: Not married nor living with a partner | Married or living with a partner Never married Widowed Divorced Separated |

According to Healthy People 2030 framework.
